# Supplementary material for: Permafrost thawing exhibits a greater influence on bacterial richnessand community structure than permafrost age in Arctic permafrostsoils
Source: Copernicus journal article supplement (doi:10.5194/tc-2020-39), 2020-03-04
Supplement: Supplementary file 1 [file tc-2020-39-supplement.pdf]

Supplementary Table 1 The individual and interactive effects of permafrost thawing status and age on the soil bacterial richness.

| Source                                        | Type III Sum<br>of Squares | d.f. | Mean Square | F     | <i>P</i> value |
|-----------------------------------------------|----------------------------|------|-------------|-------|----------------|
| Corrected Model                               | 189108                     | 11   | 17192       | 4.3   | <b>0.001</b>   |
| Intercept                                     | 3789453                    | 1    | 3789452     | 942.3 | < <b>0.001</b> |
| Permafrost thawing status                     | 81055                      | 2    | 40527       | 10.1  | < <b>0.001</b> |
| Permafrost age                                | 50181                      | 3    | 16727       | 4.2   | <b>.013</b>    |
| Permafrost thawing status ×<br>permafrost age | 27544                      | 6    | 4591        | 1.1   | .361           |
| Error                                         | 132707                     | 33   | 4021        |       |                |
| Total                                         | 4323958                    | 45   |             |       |                |
| Corrected Total                               | 321816                     | 44   |             |       |                |

Analysis is based on two-way ANOVA, significance at  $P < 0.05$  is in bold.

Supplementary Table 2 The bacterial richness by permafrost thawing status.

|            | Mean±S.D. | Active           | Transition | Permanently<br>frozen |
|------------|-----------|------------------|------------|-----------------------|
| Active     | 354 ±17   | -                | -          | -                     |
| Transition | 287±16    | <b>0.011</b>     | -          | -                     |
| Frozen     | 248±18    | <b>&lt;0.001</b> | 0.221      | -                     |

S.D. standard derivation, significance is based on the Tukey's post hoc test, statistically significant differences (at  $P < 0.05$  level) are in bold. Active, transition, and frozen are different permafrost thawing status.

Supplementary Table 3 The bacterial richness by permafrost age.

|         | Mean±S.D.<br>(%) | Young        | Medium | Old   | Ancient |
|---------|------------------|--------------|--------|-------|---------|
| Young   | 358±21           | -            | -      | -     | -       |
| Medium  | 268±19           | <b>0.001</b> | -      | -     | -       |
| Old     | 272±18           | <b>0.002</b> | 0.995  | -     | -       |
| Ancient | 287±18           | <b>0.009</b> | 0.836  | 0.931 | -       |

S.D. standard derivation, significance is based on the Tukey's post hoc tests, statistically significant differences (at  $P < 0.05$  level) are in bold. Young, medium, old, and ancient are permafrost soil ages.

Supplementary Table 4 The influence of permafrost thawing status on bacterial richness for soils of different ages.

| Soil age | Variation      | Sum of Squares | d.f. | Mean Square | F      | Sig.             |
|----------|----------------|----------------|------|-------------|--------|------------------|
| Young    | Between Groups | 70837          | 2    | 35418       | 41.644 | <b>&lt;0.001</b> |
|          | Within Groups  | 5954           | 7    | 851         |        |                  |
|          | Total          | 76790          | 9    |             |        |                  |
| Medium   | Between Groups | 5431           | 2    | 2715        | 0.898  | 0.445            |
|          | Within Groups  | 24184          | 8    | 3023        |        |                  |
|          | Total          | 29615          | 10   |             |        |                  |
| Old      | Between Groups | 9255           | 2    | 4628        | 0.798  | 0.480            |
|          | Within Groups  | 52192          | 9    | 5799        |        |                  |
|          | Total          | 61447          | 11   |             |        |                  |
| Ancient  | Between Groups | 15218          | 2    | 7609        | 1.359  | 0.305            |
|          | Within Groups  | 50378          | 9    | 5598        |        |                  |
|          | Total          | 65596          | 11   |             |        |                  |

Analysis is based on two-way ANOVA, significant influences (at  $P < 0.05$  level) are in bold. Young, medium, old, and ancient are permafrost soil ages.

Supplementary Table 5 The permafrost soil bacterial richness of the various permafrost layer in the young permafrost.

|            | Mean±S.D. (%) | Active           | Transition   | Permanently<br>frozen |
|------------|---------------|------------------|--------------|-----------------------|
| Active     | 471 ±37       | -                | -            | -                     |
| Transition | 355±22        | <b>0.002</b>     | -            | -                     |
| Frozen     | 248±19        | <b>&lt;0.001</b> | <b>0.009</b> | -                     |

Significance is based on the Tukey's post hoc test, statistically significant differences (at  $P=0.05$  level) are in bold. Active, transition, and frozen are different permafrost thawing status.

Supplementary Table 6 The richness of bacteria phyla by permafrost thawing status (*Proteobacteria* at the Class level).

|                            |            | Mean±S.D.(%) | Active       | Transition   | Frozen |
|----------------------------|------------|--------------|--------------|--------------|--------|
| <i>Firmicutes</i>          | Active     | 87±15        | -            | -            | -      |
|                            | Transition | 47±15        | <b>0.013</b> | -            | -      |
|                            | Frozen     | 49±8         | <b>0.042</b> | 0.986        | -      |
| <i>Actinobacteria</i>      | Active     | 128±14       | -            |              |        |
|                            | Transition | 106±10       | 0.062        | <b>0.021</b> |        |
|                            | Frozen     | 71±2         | <b>0.002</b> | -            |        |
| <i>Chloroflexi</i>         | Active     | 36±4         | -            | -            |        |
|                            | Transition | 29±3         | 0.095        | -            |        |
|                            | Frozen     | 16±6         | <b>0.002</b> | <b>0.02</b>  |        |
| <i>Alphaproteobacteria</i> | Active     | 35±6         | -            | -            |        |
|                            | Transition | 19±7         | 0.016        | -            |        |
|                            | Frozen     | 16±4         | 0.016        | 0.774        |        |
| <i>Deltaproteobacteria</i> | Active     | 25±8         | -            | -            |        |
|                            | Transition | 12±2         | <b>0.028</b> | -            |        |
|                            | Frozen     | 11±2         | <b>0.049</b> | 0.976        |        |

S.D. standard derivation, dominant phyla are defined with relative abundance >1% across all samples.

Significance is based on the Tukey's post hoc tests, statistically significant differences (at  $P=0.05$  level)

are in bold. S.D.: Standard derivation. Active, transition, and frozen are different permafrost thawing status.

Supplementary Table 7 The bacterial community structure differences identified among various permafrost thawing status and soil ages.

| Source                    | d.f. | SS    | MS     | Pseudo-F | P(perm)      | Unique permutations |
|---------------------------|------|-------|--------|----------|--------------|---------------------|
| Soil age                  | 3    | 11653 | 3884.2 | 2.2297   | <b>0.001</b> | 999                 |
| Thawing status            | 2    | 10890 | 5445.1 | 3.1258   | <b>0.001</b> | 998                 |
| Thawing status × soil age | 6    | 16106 | 2684.3 | 1.5409   | <b>0.001</b> | 994                 |
| Residual                  | 33   | 57486 | 1742   |          |              |                     |
| Total                     | 44   | 97193 |        |          |              |                     |

Significance is based on PERMANOVA.

Supplementary Table 8 Bacterial community structure comparison among different thawing status by PERMANOVA post-hoc analysis.

|            | Active       | Transition   | Frozen |
|------------|--------------|--------------|--------|
| Active     | -            | -            | -      |
| Transition | <b>0.006</b> | -            | -      |
| Frozen     | <b>0.001</b> | <b>0.007</b> | -      |

P-values are shown, significant P-values are shown in bold. Active, transition, and frozen are different permafrost thawing status.



Supplementary Table 9 Bacterial community structure comparison among different permafrost ages by PERMANOVA post-hoc analysis.

|         | Young        | Medium       | Old   | Ancient |
|---------|--------------|--------------|-------|---------|
| Young   | -            | -            | -     | -       |
| Medium  | <b>0.004</b> | -            | -     | -       |
| Old     | <b>0.001</b> | 0.207        | -     | -       |
| Ancient | <b>0.001</b> | <b>0.024</b> | 0.109 | -       |

P-values are shown, significant P-values are shown in bold. Young, medium, old, and ancient are permafrost soil ages.

Supplementary Table 10 The community structure differences of the soils with same age but at different permafrost thawing status.

|         | Source         | d.f. | SS    | MS   | Pseudo-F | P(perm)      | Unique permutations |
|---------|----------------|------|-------|------|----------|--------------|---------------------|
| Young   | Thawing status | 2    | 9526  | 4763 | 3.45     | <b>0.002</b> | 749                 |
|         | Residual       | 7    | 9658  | 1380 |          |              |                     |
|         | Total          | 9    | 19184 |      |          |              |                     |
| Medium  | Thawing status | 2    | 6671  | 3336 | 1.66     | <b>0.027</b> | 926                 |
|         | Residual       | 8    | 16079 | 2010 |          |              |                     |
|         | Total          | 10   | 22750 |      |          |              |                     |
| Old     | Thawing status | 2    | 4807  | 2404 | 1.3      | 0.124        | 914                 |
|         | Residual       | 9    | 16699 | 1855 |          |              |                     |
|         | Total          | 11   | 21506 |      |          |              |                     |
| Ancient | Thawing status | 2    | 5853  | 2927 | 1.75     | <b>0.016</b> | 914                 |
|         | Residual       | 9    | 15050 | 1672 |          |              |                     |
|         | Total          | 11   | 20904 |      |          |              |                     |

Significance is based on PERMANOVA. Young, medium, old, and ancient are permafrost soil ages.

Supplementary Table 11 The community structure differences of the soils with same thawing status but at different permafrost ages.

|            | Source   | d.f. | SS     | MS     | Pseudo-F | P(perm)      | Unique permutations |
|------------|----------|------|--------|--------|----------|--------------|---------------------|
| Active     | Soil age | 3    | 10650  | 3550.2 | 2.2246   | <b>0.001</b> | 999                 |
|            | Residual | 11   | 17554  | 1595.8 |          |              |                     |
|            | Total    | 14   | 28205  |        |          |              |                     |
| Transition | Soil age | 3    | 9873.4 | 3291.1 | 1.9473   | <b>0.001</b> | 999                 |
|            | Residual | 11   | 20281  | 1690.1 |          |              |                     |
|            | Total    | 14   | 30154  |        |          |              |                     |
| Frozen     | Soil age | 3    | 8186.2 | 2728.7 | 1.3886   | <b>0.043</b> | 998                 |
|            | Residual | 11   | 19651  | 1965.1 |          |              |                     |
|            | Total    | 14   | 27837  |        |          |              |                     |

Significance is based on PERMANOVA. Active, transition, and frozen are different permafrost thawing status.

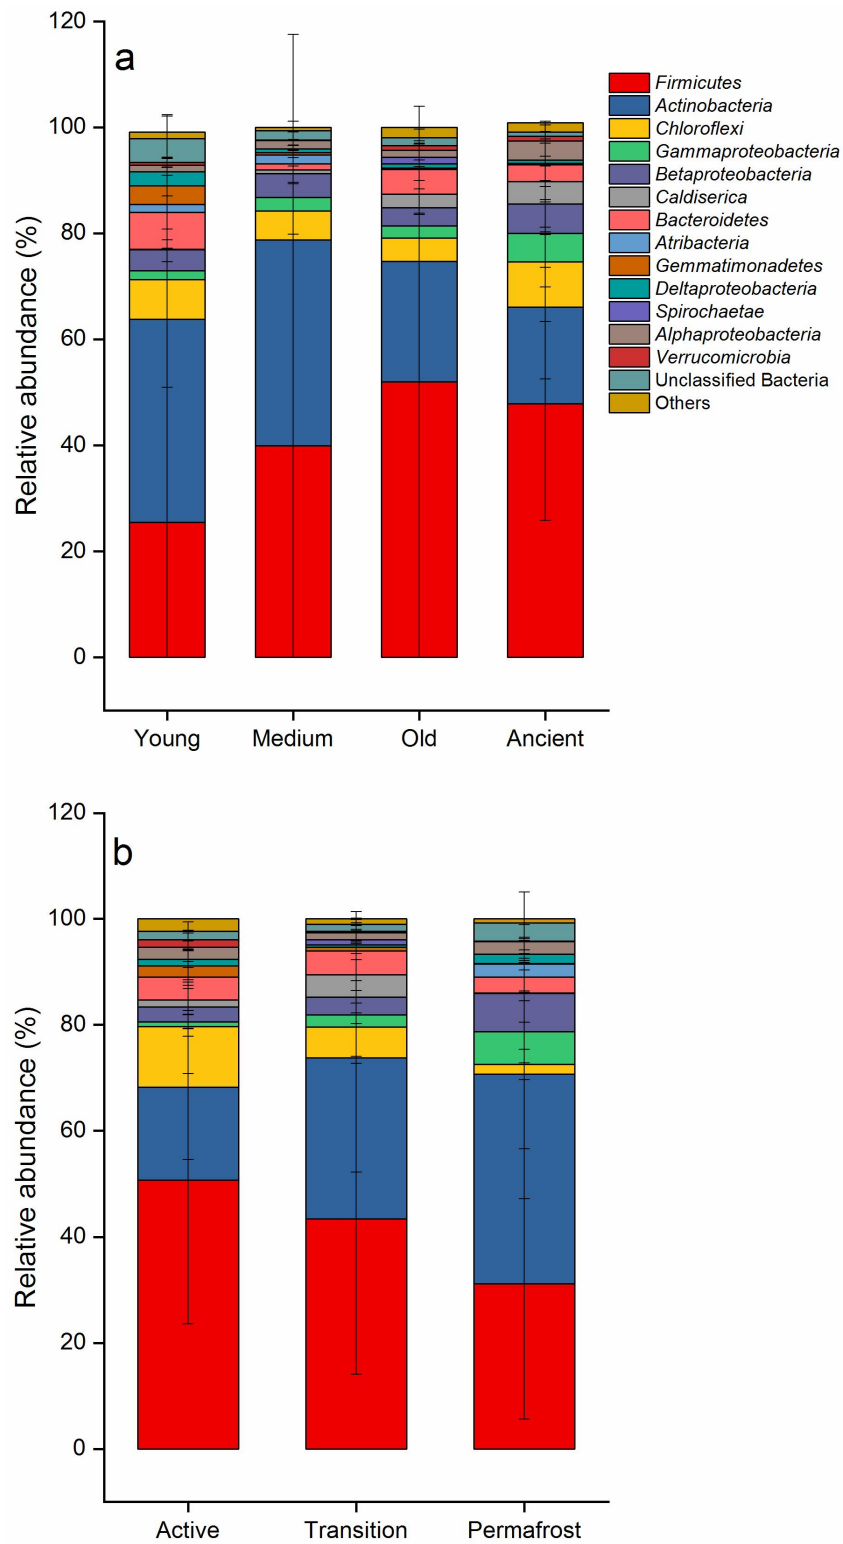

Fig. S1 The relative abundance of the dominant bacteria with the permafrost age (a) and thawing status (b). *Proteobacteria* are at the class level. Young, medium, old, and ancient are permafrost soil ages, active, transition, and frozen are different permafrost thawing status.

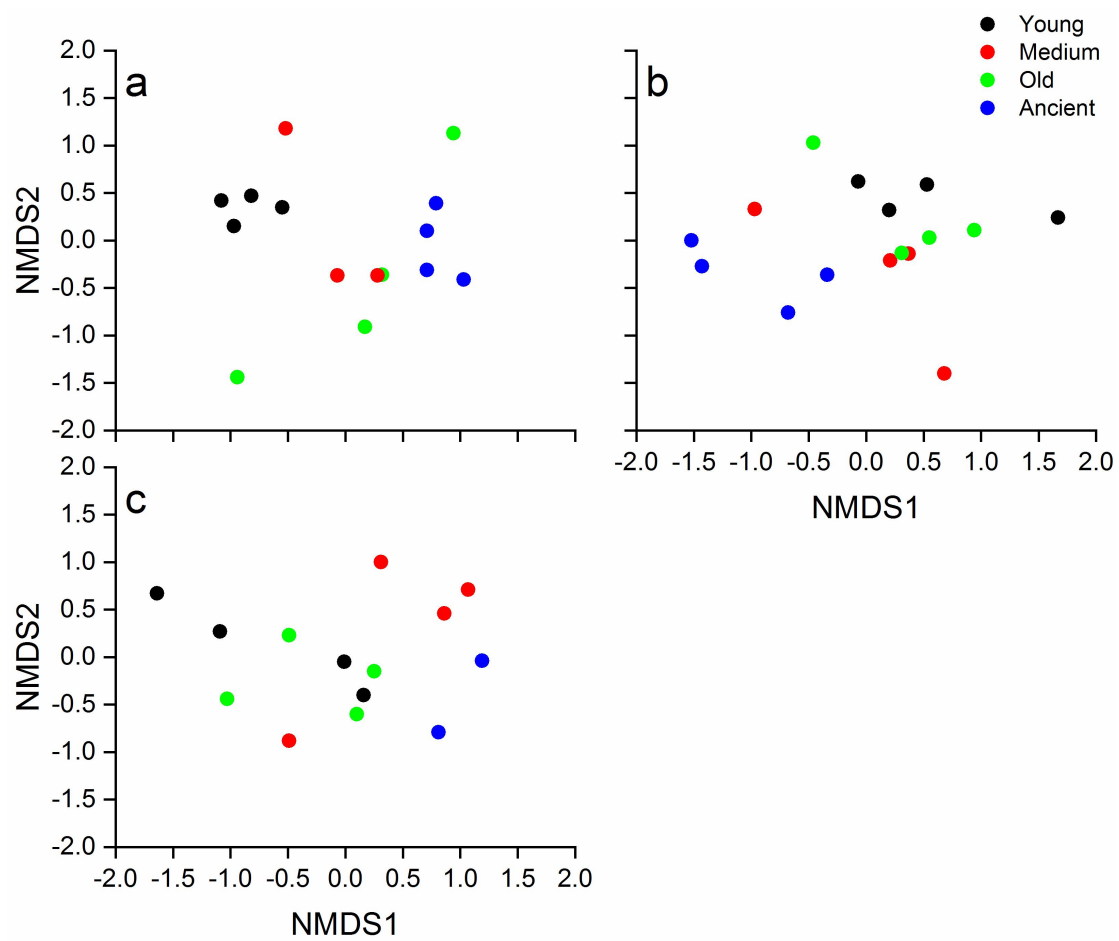

Fig. S2 NMDS ordination plot showing the community structure for permafrost soil bacteria with different permafrost ages but at the same thawing status. (a), the active layer of permafrost; (b), the transition layer of permafrost, and (c), the permanently frozen layer of the permafrost. Young, medium, old, and ancient are permafrost soil ages.

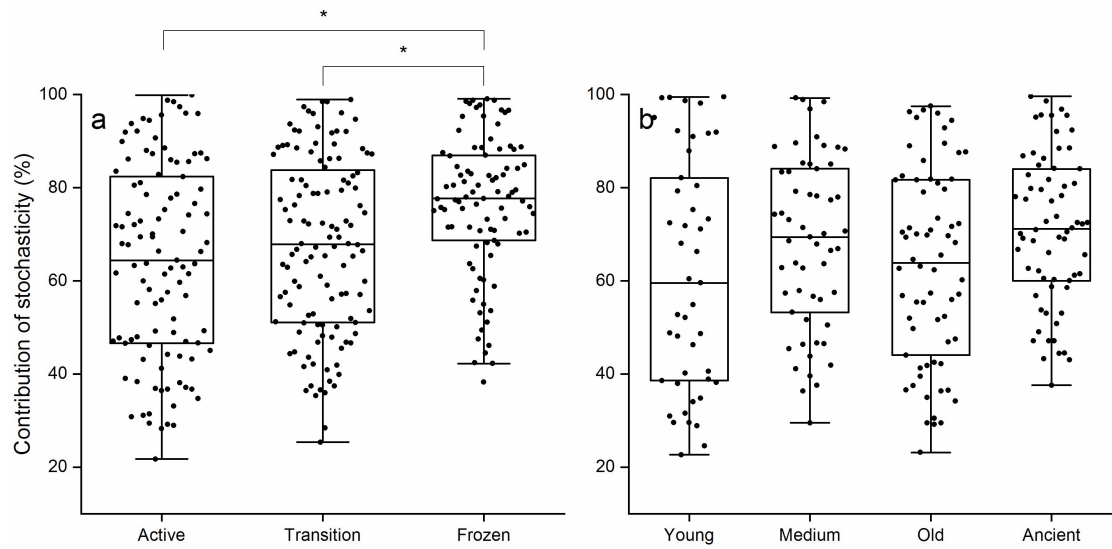

Fig. S3 Contribution of stochasticity on the bacterial community assembly for different permafrost thawing status (a) and soil ages (b). Contribution of stochasticity was based on the modified stochasticity index. \* indicates significance at  $P < 0.05$ . Young, medium, old, and ancient are permafrost soil ages. Active, transition, and frozen are different permafrost thawing status.
